# Supplementary material for: An ordered nanocomposite of organic radicalpolymer and mesocellular carbon foam as cathode material in lithium ion batteries
Source: Royal Society of Chemistry journal article supplement (doi:10.1039/c1jm15053g), 2011-11-24
Supplement: c1jm15053g.pdf [file c1jm15053g.pdf]

## **An ordered nanocomposite of organic radical polymer and mesocellular carbon foam as cathode material in lithium ion batteries**

Younghoon Kim<sup>a</sup>, Changshin Jo<sup>b</sup>, Jinwoo Lee<sup>b</sup>, Chul Wee Lee<sup>\*a</sup>, and Songhun Yoon<sup>\*a</sup>

<sup>a</sup> *Green Chemical Technology Division, Korea Research Institute of Chemical Technology (KRICT), Daejeon 305-600, Korea, E-mail: [chulwee@kRICT.re.kr](mailto:chulwee@kRICT.re.kr), [yoonsun@kRICT.re.kr](mailto:yoonsun@kRICT.re.kr)*

<sup>b</sup> *Department of Chemical Engineering, Pohang University of Science and Technology, Kyungbuk 790-784, Korea, E-mail: [jinwoo03@postech.ac.kr](mailto:jinwoo03@postech.ac.kr)*

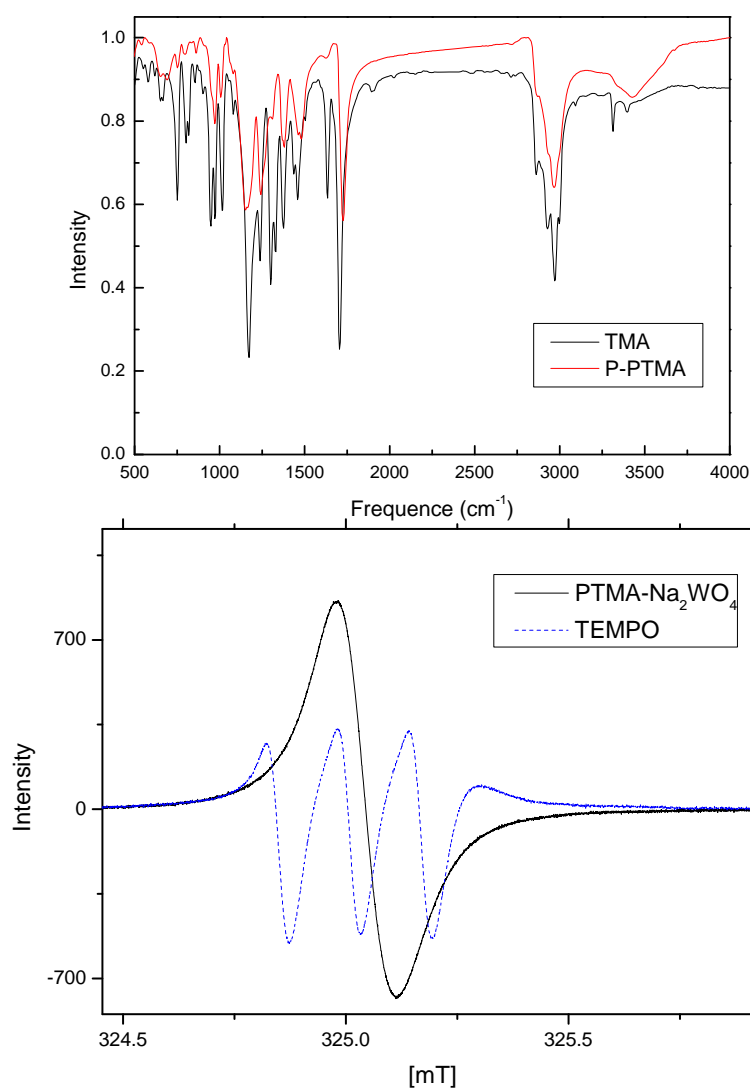

**Fig. S1.** (upper) Change of IR spectra after polymerization TMA monomer (lower) Electron paramagnetic spectroscopy results of TEMPO radical and the prepared PTMA radical polymer. The radical concentration was calculated by double-integration of EPR spectra, which produced 99.9% radical concentration of PTMA of theoretical radical spin concentration ( $2.5 \times 10^{12}$  spins/g).

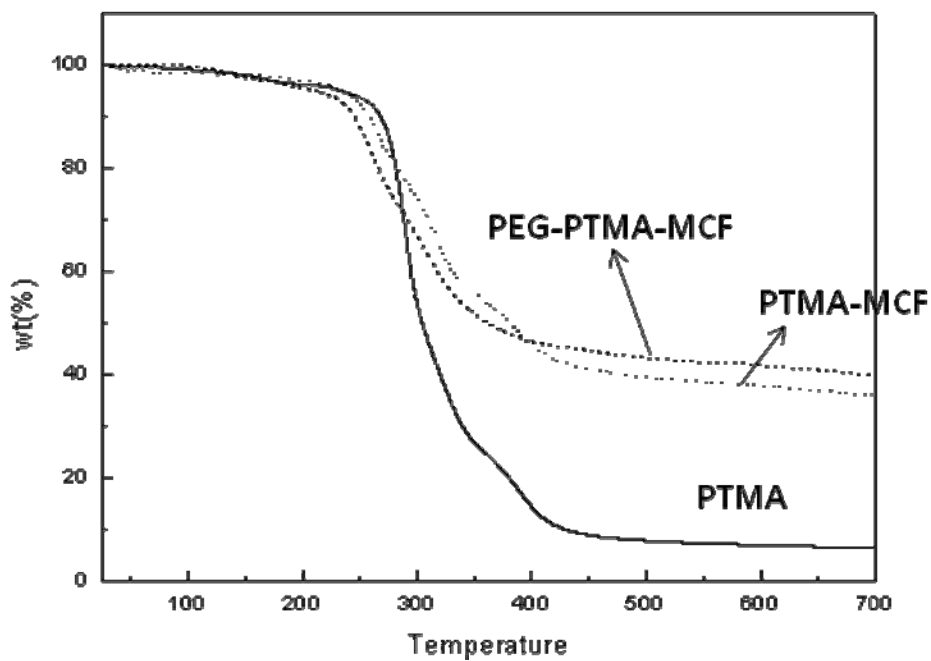

**Fig. S2.** Thermogravimetric analysis (TGA) of PTMA, PTMA-MCF and PEG-PTMA-MCF under N<sub>2</sub> atmosphere to 700 °C at 5 °C/min. From the weight loss change in PEG-PTMA-MCF, the loaded PEG was estimated to be 3.6 wt%.

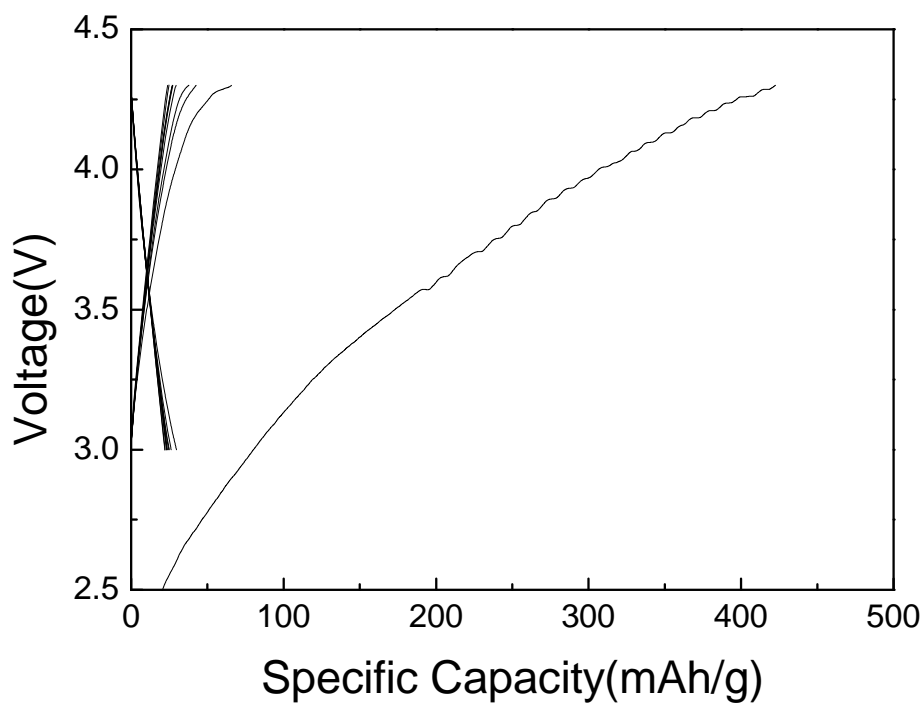

**Fig. S3.** Galvanostatic charge-discharge pattern of MCF electrode at 1 C current rate from 3.0 to 4.3 V vs.  $\text{Li/Li}^+$ . Large irreversible charging capacity was possibly due to the electrolyte decomposition on the surface functional group and possible water decomposition trapped at the carbon surface.

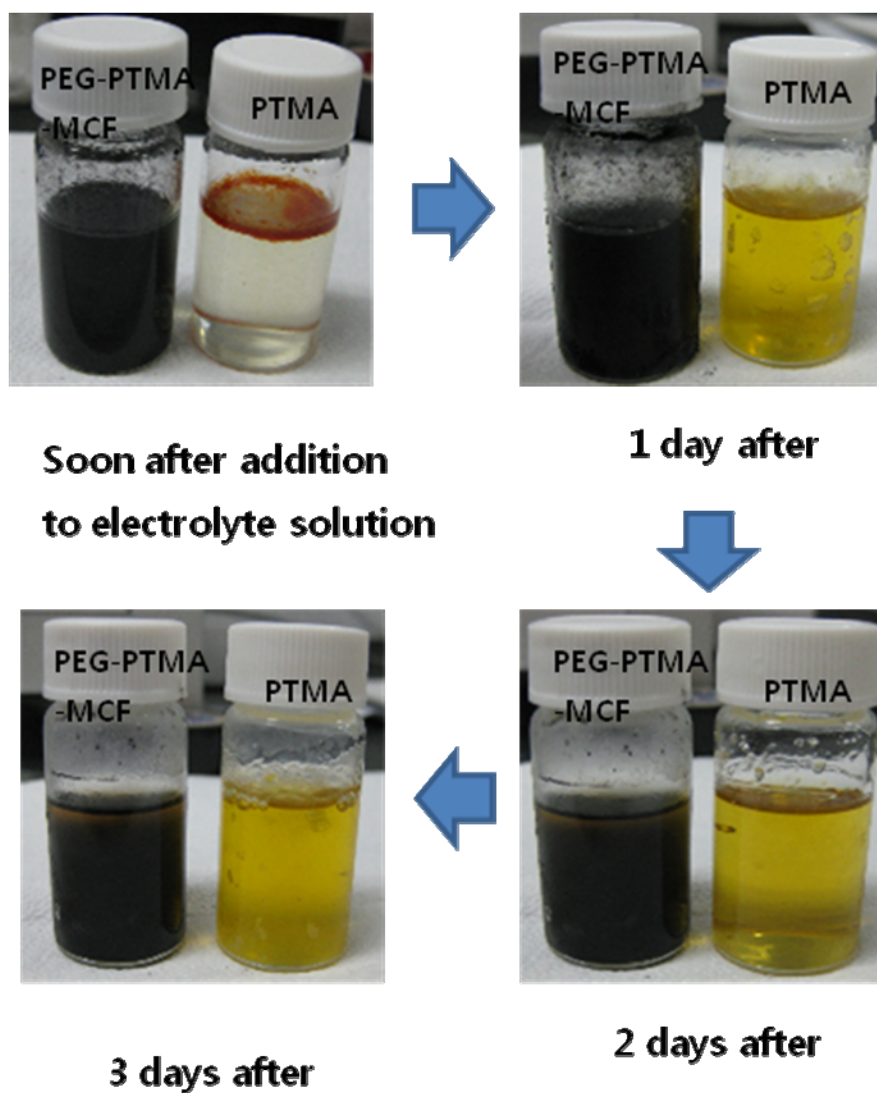

**Fig. S4.** Dissolution experiment of PTMA and PEG-PTMA-MCF in at 50 °C. Here, 0.1 g materials were dissolved in 5 mL electrolyte solution of 1.0 M LiPF<sub>6</sub> in EC/ DMC.
